# Psychiatrists Professional Liability Insurance

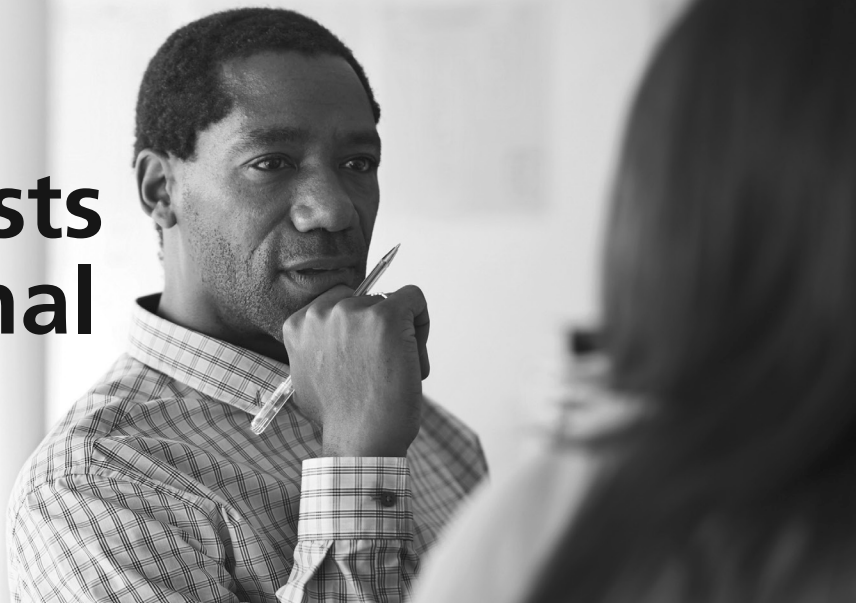

## Discounts Offered Include:

- ✓ **15% NEW POLICYHOLDER DISCOUNT\***  
(must be claims free for the last 6 months)
- ✓ **Up to 50% New Doctor Discount** (for those who qualify)
- ✓ **10% Claims Free Discount** (for those practicing 10 years, after completion of training, and remain claims free)
- ✓ **50% Resident-Fellow Member Discount**
- ✓ **15% Child and Adolescent Psychiatrist Discount** (for those whose patient base is more than 50% children and adolescents)
- ✓ **50% Part-time Discount** (for up to 20 client hours a week or less)
- ✓ **5% Risk Management Discount** (for 3 hours of CME)

*\*Where allowable by law and currently not available in AK or NY.  
(Above Discounts and Coverage Features are subject to individual state approval.)*

**40**  
YEARS

For over 40 years we have provided exceptional protection and have a reputation for outstanding customer service. Our extensive years of experience and industry knowledge allows us to help you by providing worry free coverage so you can concentrate on what you do best – helping people help themselves. When it comes to caring about people, we have a lot in common.

## Our Psychiatrists Professional Liability Program Provides:

- Limits up to \$150,000 in Defense Expenses related to Licensing Board Hearings and other Proceedings
- Up to \$150,000 in Fire Legal Liability Coverage
- Up to \$100,000 in Medical Payments for Bodily Injury
- Up to \$25,000 for First Party Assault and Battery Coverage
- Up to \$25,000 for Information Privacy Coverage (HIPAA)
- Up to \$15,000 in Emergency Aid Coverage
- Insured's Consent to Settle required in the settlement of any claim – No arbitration clause
- Telepsychiatry, ECT, Forensic Psychiatry Coverage
- Risk Management Hotline with 24/7 Service for Emergencies

Visit us at [apamalpractice.com](http://apamalpractice.com) or call **877.740.1777** to learn more.

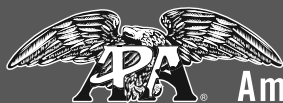

**American Professional Agency**

LEADERS IN PSYCHIATRIC MEDICAL LIABILITY INSURANCE

Endorsed by:

AMERICAN  
PSYCHIATRIC  
ASSOCIATION

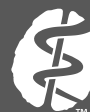

Source: http://ajp.psychiatryonline.org/doi/suppl/10.1176/ajp.2019.176.issue-4/suppl_file/back.pdf
