# The American Journal of Psychiatry

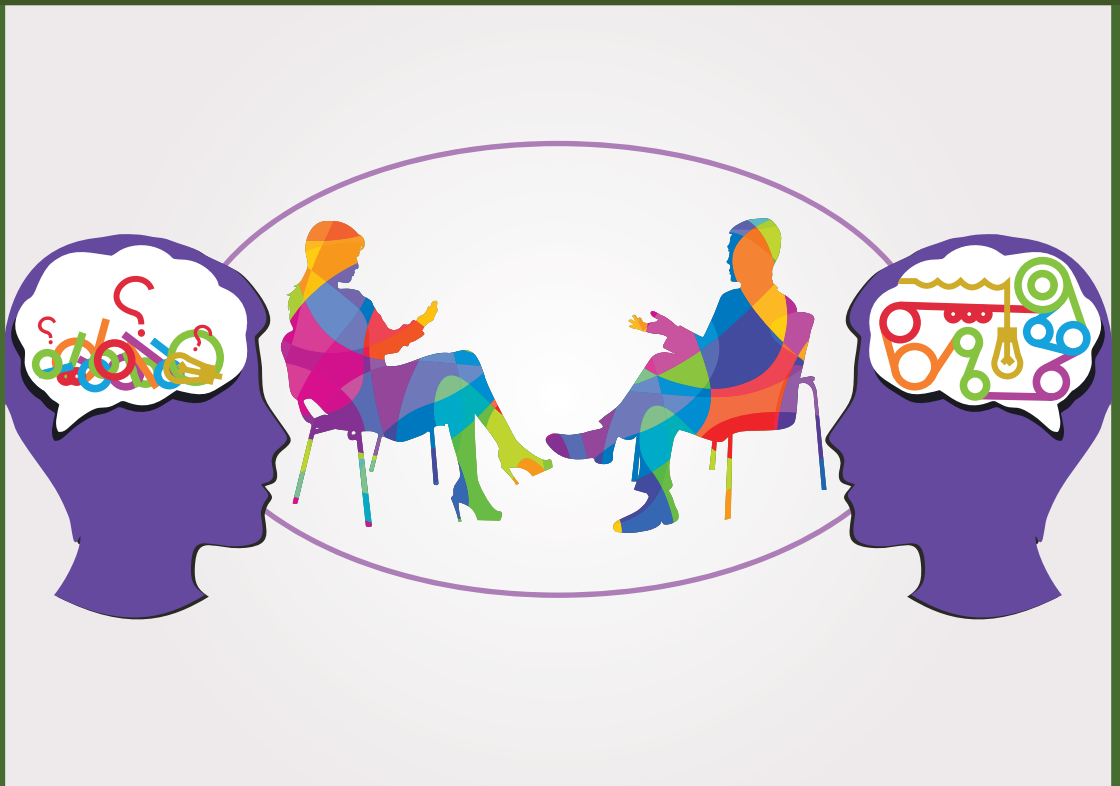

Optimizing the Efficacy of Psychotherapy,  
Cognitive Training, and Internet Interventions

Benefits of Sequentially Adding Cognitive-Behavioral Therapy or  
Antidepressant Medication for Adults With Nonremitting Depression

Doubly Randomized Preference Trial of Prolonged  
Exposure Versus Sertraline for Treatment of PTSD

Proof of Concept for an Adaptive Treatment Strategy  
to Prevent Failures in Internet-Delivered CBT
