# APA JobCentral

The Career Hub for Psychiatry

## Manage Your Career

- Browse hundreds of active job listings!
- Create an account to save jobs, store multiple resumes and cover letters and communicate with employers through our internal messaging system.
- Set up multiple job alerts specifying your skills, interests and location to receive e-mails when employers post jobs that match your criteria.

## Recruit for Open Positions

- Post your job in front of thousands of highly qualified psychiatrists.
- Cross promote your job listing in *Psychiatric News*.
- Search the anonymous resume database to find your ideal candidate.

[jobs.psychiatry.org](http://jobs.psychiatry.org)

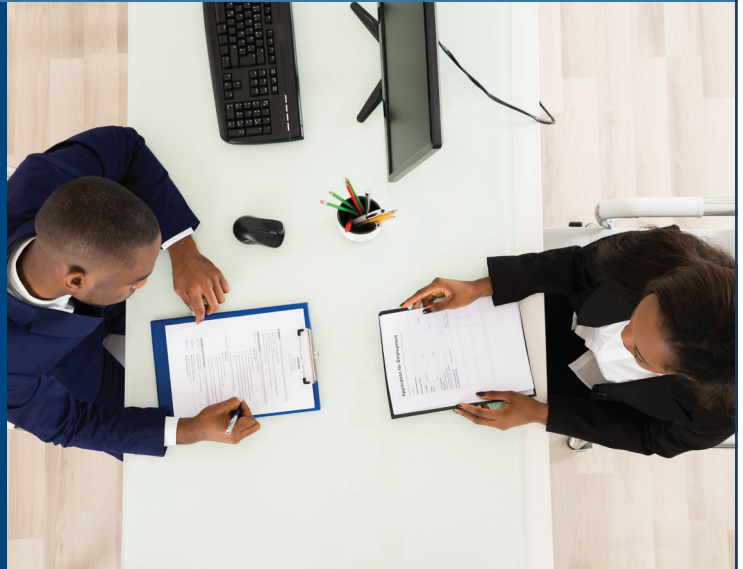

AMERICAN  
PSYCHIATRIC  
ASSOCIATION

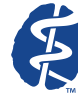

**JOBCENTRAL**

The Career Hub for Psychiatry

AH1903A

**civilian CORPS**  
★ U.S. Army

**WORLD-CLASS HEALTH CARE  
FIRST-RATE BENEFITS**

Practice alongside other highly skilled civilian and military health care providers worldwide, and experience professional opportunities and benefits that can only be found in the Civilian Corps.

- Excellent Federal Benefits
- Potential Recruitment Bonuses
- Flexible Schedules
- Job Security
- Favorable Work Environment
- Worldwide Locations
- 60% of Army Hospital Employees are Civilians
- No Active Duty Military Requirements

FIND JOBS | POST YOUR CV | APPLY TODAY  
[CivilianMedicalJobs.com/AJP](http://CivilianMedicalJobs.com/AJP)

**APA Membership  
for every step of  
your career  
Join us today**

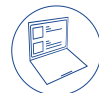

**World-Class Learning**

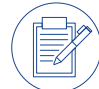

**Practice Resources**

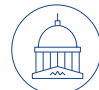

**Advocacy for Mental Health**

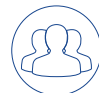

**A Professional Community**

[psychiatry.org/JoinAPA](http://psychiatry.org/JoinAPA)

Former member? You're likely eligible for dues amnesty. Contact us at [membership@psych.org](mailto:membership@psych.org) or 1-888-357-7924 for more information.

Join the *family*

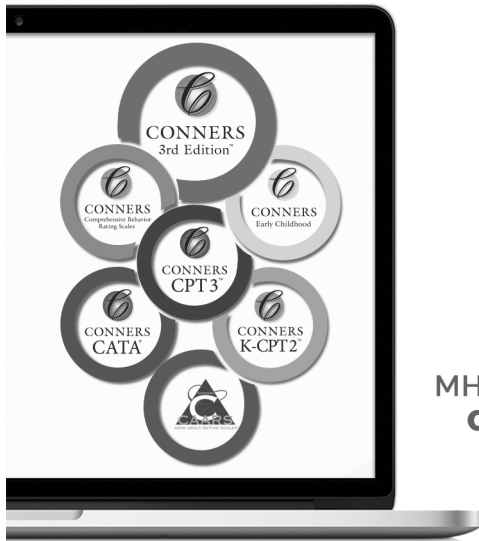

**MHS**  
ASSESSMENTS

MHS.com/  
**Connors**

**Trust in the Connors family to provide:**

- **Easy online assessment** that includes scoring and three detailed, visual report options at no additional cost
- **Improve the impact of your intervention** and treatment strategies by identifying specific challenge areas to work on
- **Reliable instruments** developed with highly representative normative samples and strong psychometric properties

**The American Psychiatric Association  
Publishing Textbook of Psychiatry,  
Seventh Edition**

**Coming  
May 2019!**

*Edited by  
Laura Weiss Roberts, M.D., M.A.  
Foreword by David J. Kupfer, M.D.*

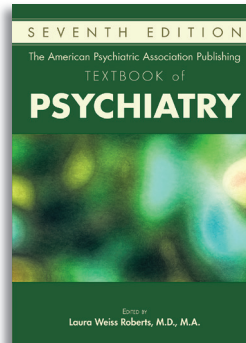

**T**horoughly revised and featuring new authors and content, the seventh edition raises the bar, adding age-related, cultural, societal, and population considerations in the practice of psychiatry to the authoritative text that generations of students, residents, and clinicians have heretofore relied upon.

2019 • 1,520 pages • ISBN 978-1-61537-150-1 • Paperback

**Special Prepublication Price of \$235.00 until May 15, 2019**  
(thereafter \$275.00) • Item #37150

2019 • 1,520 pages • ISBN 978-1-61537-256-0 • eBook • \$220.00 • Item #37256

AMERICAN  
**PSYCHIATRIC  
ASSOCIATION**  
**PUBLISHING**

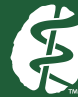

Order:

www.appi.org

Email: appi@psych.org

Phone: 1-800-368-5777

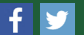

Special Discounts for APA Members AH1911A

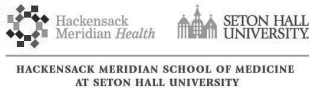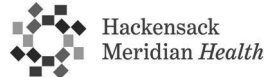

**Department of Psychiatry**

*With the continued growth of our Department of Psychiatry and our New General Psychiatry Residency Programs at Ocean Medical Center and Jersey Shore University Medical Center our vision for Behavioral Health is Bright.*

**Hackensack Meridian Health** is a leading not-for-profit health care network in New Jersey offering a complete range of medical services, innovative research, and life enhancing care aiming to serve as a national model for changing and simplifying health care delivery through partnerships with innovative companies and focusing on quality and safety.

Through a partnership between Hackensack Meridian Health and Seton Hall University, the School of Medicine will re-define graduate medical education, research, and clinical practice; reverse the critical physician shortage in both the New York/New Jersey metropolitan area and the nation; and stimulate economic development in northern New Jersey.

The School of Medicine will be the anchor in the development of a comprehensive health sciences campus that will also include research facilities and biotechnology endeavors – all in service of educating tomorrow's doctors, discovering novel therapies, and facilitating compassionate and effective healthcare that will meet the ever-changing needs of tomorrow's patients.

The School of Medicine will be the cornerstone of a dynamic venue for the exchange of ideas, the development of healthcare and research thought leaders and practitioners, and the discovery of novel therapies to meet the medical challenges of the future.

"Ocean Medical Center's psychiatry program will be a community-based program," said Ramon Solhkhah, M.D., program director for psychiatry as well as founding Chair of Psychiatry & Behavioral Health at the Hackensack Meridian School of Medicine at Seton Hall University. "Our new psychiatry residency program will improve clinical care and ultimately encourage future health care leaders to build practices in the Jersey Shore area."

As the area's premier provider of psychiatric services, **Hackensack Meridian Behavioral Health Services** has provided comprehensive mental health and substance abuse services to the residents of Monmouth, Ocean, Middlesex, and Bergen Counties for over forty years. Due to continued growth and expansion, we are currently accepting applications for Psychiatrists to join our Mental Health and Addiction Interdisciplinary Teams in the following positions:

- Medical Director/Section Chief, Child & Adolescent Psychiatry: Jersey Shore University Medical Center (Neptune, NJ)
- Outpatient Child & Adolescent Psychiatrist: Jersey Shore University Medical Center (Neptune, NJ) and Hackensack University Medical Center (Hackensack, NJ)
- Consultation Liaison Psychiatrists: Jersey Shore University Medical Center (Neptune, NJ) and Riverview Medical Center (Red Bank, NJ) and Hackensack University Medical Center (Hackensack, NJ)
- Staff Psychiatrist for Adult Inpatient Unit: Jersey Shore University Medical Center (Neptune, NJ) and Riverview Medical Center (Red Bank, NJ) and Hackensack University Medical Center (Hackensack, NJ)
- Outpatient General Psychiatrist: Jersey Shore University Medical Center (Neptune, NJ), Riverview Medical Center (Red Bank, NJ), and Raritan Bay Medical Center (Perth Amboy, NJ)
- Medical Director of Adult Inpatient Unit Riverview (Red Bank, NJ)
- Emergency Psychiatry: Raritan Bay Medical Center (Perth Amboy, NJ)
- Geriatric Psychiatry – Hackensack University Medical Center (Hackensack, NJ)

In addition to our collegial work environment, we offer a highly competitive compensation package which includes: medical/dental plans, 403(b) retirement plan, and relocation assistance. **For immediate consideration, please contact Renee Theobald, at: Renee.Theobald@hackensackmeridian.org or call: 732 751-3597**

# The American Journal of Psychiatry

## Residents' Journal

[ajp.psychiatryonline.org/loi/ajp-rj](http://ajp.psychiatryonline.org/loi/ajp-rj)

### March 2019

- 2 Psychiatry in the United States Army**  
Aaron Wolfgang, M.D., and Sean Wilkes, M.D., M.Sc.  
*Assessing clinical, operational, and academic domains*
- 5 The Value of an Integrated Psychiatrist on an Epilepsy Unit in the Management of Nonepileptic Seizures**  
Khushminder Chahal, M.D.  
*Addressing existing gaps in psychiatric treatment*
- 6 An Interview With Dr. Joel Fuhrman on the Importance of Diet**  
Oliver M. Glass, M.D.  
*Emphasizing the impact of nutrition on mental and physiological health*
- 8 Empathy in Psychiatry: Reflection on a Patient Interview**  
Ronald Laracuenta, A.B.  
*Contemplating cultural understanding of mental illness*
- 11 Residents' Resources**
- 12 Information for Authors and Upcoming Themes**

**The Residents' Journal** is an e-publication that serves as a forum for sharing ideas and experiences in training, clinical practice, research, and careers.

**The Residents' Journal** considers manuscripts authored by medical students, resident physicians, and fellows. For information about submitting manuscripts, visit the **Author Resources** page online: [https://ajp.psychiatryonline.org/residents\\_journal/rj\\_ifora](https://ajp.psychiatryonline.org/residents_journal/rj_ifora).

### 2018–2019 Editorial Board

**Editor-in-Chief:** Oliver Glass, M.D.

**Senior Deputy Editor:** Shapir Rosenberg, M.D.

**Deputy Editor:** Matthew Edwards, M.D.

**Deputy Editor:** Anna Kim, M.D.

**Deputy Editor/Podcast Editor:**  
Lindsay Lebin, M.D.

**Associate Editors:** Carol Chan, M.D.

Alexander Cole, M.D.

Jason Garner, M.D., J.D.

David Latov, M.D.

Elon Richman, M.D.

**Culture Editor:** Erik Bayona, M.D.

**Culture Editor/Social Media Editor:**  
Somya Abubucker, M.D.

### CALL FOR PAPERS

All article types are welcome; all submissions will be peer reviewed.

To submit an article, go to <https://mc.manuscriptcentral.com/appi-ajp>, and select a manuscript type for AJP Residents' Journal.

 [Facebook.com/AJPResidentsJournal](https://www.facebook.com/AJPResidentsJournal)

 @AJP\_ResJournal

AMERICAN  
PSYCHIATRIC  
ASSOCIATION

PUBLISHING

[www.appi.org](http://www.appi.org)

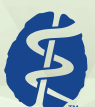

# Go Online

Visit [ajp.psychiatryonline.org](http://ajp.psychiatryonline.org) for these features!

## **AJP in Advance** *Discover the latest research advances before they appear in print*

### **Role of Neuronal VEGF Signaling in the Prefrontal Cortex in the Rapid Antidepressant Effects of Ketamine**

Vascular endothelial growth factor (VEGF) activity in the medial prefrontal cortex (mPFC) mediates the behavioral and neurotrophic actions of ketamine. Intra-mPFC infusions of VEGF can produce rapid ketamine-like behavioral effects, which are blocked by deletion of the Flk-1 receptor.

### **Trajectories of Response to Dorsolateral Prefrontal rTMS in Major Depression: A THREE-D Study**

Repetitive transcranial magnetic stimulation (rTMS) has promise as a treatment but different patients exhibit particularly strong or weak responses. The authors examine the relationship between baseline clinical features and clinical response to rTMS. Their findings suggest that baseline characteristics predict outcome more powerfully than the form of rTMS.

## **AJP CME** *Earn CME credit: 3 courses per issue*

This month's courses appear on pages 325–328.

Each short course is based on one article in this issue and can earn up to 1 *AMA PRA Category 1 Credit™*. CME credit is issued only **online**, and a paid subscription to AJP's CME course program is required.

Visit [psychiatryonline.org/cme](http://psychiatryonline.org/cme) and click on the "American Journal of Psychiatry" tab.

## **AJP Multimedia** *Access Audio or Video for highlights of each issue*

In AJP Audio this month, Executive Editor Michael Roy speaks with Lori A. Zoellner, Ph.D., about her research on how patient treatment preference affects outcomes in the treatment of posttraumatic stress disorder.

In this month's video, Deputy Editor Daniel S. Pine, M.D., discusses the articles "Doubly Randomized Preference Trial of Prolonged Exposure Versus Sertraline for Treatment of PTSD" and "Guanfacine Augmentation of a Combined Intervention of Computerized Cognitive Remediation Therapy and Social Skills Training for Schizotypal Personality Disorder."

## **History of Psychiatry** *Revisit the field's rich history through the AJP Archive*

### **75 Years Ago: Celebrating the First 100 Years**

The April 1944 issue features articles on the first 100 years of the *Journal* and of psychiatry, including the rise of psychiatric hospitals and education, the use of psychiatrists in personnel and legal matters, changes in societal attitudes about the mentally ill, and biographies of Dorothea Dix, Clifford Beers, Silas Weir Mitchell, and the first four editors of the *Journal*.

Psychiatry Online

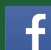

@AmJPsychiatry

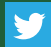

AMERICAN  
PSYCHIATRIC  
ASSOCIATION  
PUBLISHING

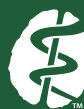

[www.appi.org](http://www.appi.org)  
1-800-368-5777  
[appi@psych.org](mailto:appi@psych.org)

# Psychiatrists

## MINNESOTA

HealthPartners is one of the Upper Midwest's leading multispecialty physician groups. We have practice opportunities for talented, caring BC/BE psychiatrists in metropolitan Minneapolis/St. Paul and central Minnesota.

## Inpatient/Adult

- **Regions Hospital (St. Paul, MN)**

Our state-of-the-art inpatient psychiatric facilities allow our team of psychiatrists, residents, therapists, social workers, NPs/PAs and nursing staff to provide exceptional care to adult psychiatric inpatients. Our Regions care model schedule is 7 days on/7 days off.

## Outpatient/Adult

- **Central Minnesota (Sartell/St. Cloud)**
- **Metropolitan Minneapolis/St. Paul**

These teams provide integrated outpatient mental health services in our primary care and outpatient specialty clinics located within a variety of urban, suburban and semi-rural communities. Full-time or part-time practices are available. No hospital call responsibilities.

In addition to competitive salaries, HealthPartners offers an excellent benefits package, including an employer-matched 401(k) and 457(b), generous personal time off, malpractice insurance coverage, and more.

Let us tell you more! Please forward your CV and cover letter to: [lori.m.fake@healthpartners.com](mailto:lori.m.fake@healthpartners.com), apply online at [healthpartners.com/careers](http://healthpartners.com/careers), or call 800-472-4695 x1. EOE

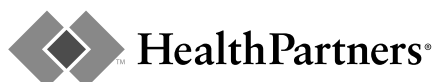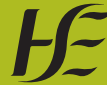

Seirbhís Sláinte  
Níos Fearr  
á Forbairt

Building a  
Better Health  
Service

IRELAND

## PSYCHIATRIST CONSULTANT POSTS IRELAND

The Health Service Executive invites applications for the following Consultant Psychiatrist positions, located in the **Community Healthcare Organisation 8**:

### Consultant Child & Adolescent Psychiatrist

- **Laois/Offaly/Longford/Westmeath Mental Health Service**
- **Longford/Westmeath Mental Health Service**

Closing date for receipt of completed applications is 3pm Thursday 30th May.

For further information on the Mental Health Services in Ireland please go to [http://www.hse.ie/portal/eng/services/list/4/Mental\\_Health\\_Services/](http://www.hse.ie/portal/eng/services/list/4/Mental_Health_Services/)

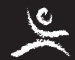

publicjobs.ie

An tSeirbhís um Cheapacháin Phoiblí  
Public Appointments Service

We are committed to a policy of equal opportunity and encourage applications under all nine grounds of the Employment Equality Act.

Cuirfear fáilte roimh chomhfhreagras  
i nGaeilge

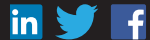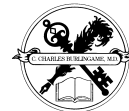

We are pleased to announce that  
**MAX FINK, M.D.**  
is the 2019 recipient of the  
**C. CHARLES BURLINGAME, M.D. AWARD**  
for his outstanding contributions to psychiatry.

### Past Recipients

- 1988 Robert Kellner, M.D., Ph.D.
- 1989 William T. Carpenter, Jr., M.D.
- 1990 Dennis P. Cantwell, M.D.
- 1991 George E. Vaillant, M.D.
- 1992 A. John Rush, M.D.
- 1993 John C. Nemiah, M.D.
- 1994 Maurice J. Martin, M.D.
- 1995 Otto F. Kernberg, M.D.
- 1996 Charles P. O'Brien, M.D., Ph.D.
- 1997 Glen Owen Gabbard, M.D.
- 1998 Lissy F. Jarvik, M.D., Ph.D.
- 1999 Nancy C. Andreasen, M.D., Ph.D.
- 2000 Lewis L. Judd, M.D.
- 2001 Paul S. Appelbaum, M.D.
- 2002 Charles B. Nemeroff, M.D., Ph.D.
- 2003 Dilip V. Jeste, M.D.
- 2004 David H. Barlow, Ph.D.
- 2005 Herbert D. Kleber, M.D.
- 2006 Daniel N. Stern, M.D.
- 2007 Jerrold F. Rosenbaum, M.D.
- 2008 K. Ranga Rama Krishnan, M.D.
- 2009 David J. Kupfer, M.D.
- 2010 Professor Sir Michael Rutter
- 2011 Jeffrey A. Lieberman, M.D.
- 2012 Judith L. Rapoport, M.D.
- 2013 Nora D. Volkow, M.D.
- 2014 Daniel R. Weinberger, M.D.
- 2015 David A. Brent, M.D.
- 2016 Steven S. Sharfstein, M.D.
- 2017 Harold Alan Pincus, M.D.
- 2018 Kenneth S. Kendler, M.D.

Institute  
of Living

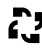

A Division of Hartford Hospital  
200 Retreat Avenue  
Burlingame Building  
Hartford, CT 06106  
860-545-7560
