## PERSPECTIVAS

### NOTA DEL EDITOR

- 257 Optimización de la eficacia de la psicoterapia, el entrenamiento cognitivo y las intervenciones por Internet**  
*Ned H. Kalin, M.D.*

### EDITORIALES

- 259 Tratamiento de depresión versus tratamiento de TEPT**  
*Steven D. Hollon, Ph.D.*
- 262 ¿Ha llegado la hora de la remediación cognitiva en esquizofrenia... de nuevo ?**  
*Sophia Vinogradov, M.D.*
- 265 Remediación cognitiva y entrenamiento en habilidades sociales para el trastorno de la personalidad esquizotípica: ¿Mayores ganancias con guanfacina?**  
*Susan R. McGurk, Ph.D.*
- 267 Utilización del insomnio como modelo para optimizar la psicoterapia ofrecida por Internet**  
*Meredith E. Rumble, Ph.D., David T. Plante, M.D., Ph.D.*

### CONFERENCIA DE CASO CLÍNICO

- 269 Comorbilidad psiquiátrica en la enfermedad de moyamoya y guías preliminares para su tratamiento**  
*Misty Richards, M.S., M.D., et al.* **CME**

## NUEVAS INVESTIGACIONES

### ARTÍCULOS

- 275 Beneficios de adicionar secuencialmente terapia cognitivo-conductual o medicación antidepressiva para adultos con depresión que no remite**  
*Boadie W. Dunlop, M.D., et al.* **EDITORIAL**
- Anteriormente, los pacientes deprimidos que recibían tratamiento y que no remitían ni con TCC ni con un antidepressivo nunca demostraron ganancias robustas después de la adición del tratamiento complementario, aunque la ansiedad comórbida predecía menor beneficio. Más del 80% de los pacientes se mantuvieron libres de recaídas durante un seguimiento de 18 meses.
- 287 Ensayo de preferencias doblemente aleatorizado de exposición prolongada versus sertralina para el tratamiento de TEPT**  
*Lori A. Zoellner, Ph.D., et al.* **EDITORIAL • CME • AUDIO • VIDEO**
- Cuando se les da oportunidad de escoger, los pacientes con TEPT crónico prefieren la terapia de exposición (61%) que la farmacoterapia (39%). Recibir el tratamiento preferido por cada paciente estuvo asociado a una adherencia sustancialmente mejor al tratamiento.
- 297 Un ensayo controlado y aleatorizado de entrenamiento en funcionamiento ejecutivo, comparado con entrenamiento perceptual, para los trastornos del espectro de la esquizofrenia: Efectos en la neuropsicología, la neurocognición y el funcionamiento**  
*Michael W. Best, M.Sc., et al.* **EDITORIAL**
- Si bien las técnicas de entrenamiento perceptual produjeron mayores mejoras en las medidas proximales de EEG, en las evaluaciones de seguimiento, el entrenamiento ejecutivo resultó en mayores mejoras en la actividad EEG relacionada con la memoria de trabajo, la neurocognición, la competencia funcional y el funcionamiento de la comunidad evaluado clínicamente.

**307 Aumento con guanfacina de una intervención combinada de terapia de remediación cognitiva informatizada y entrenamiento en habilidades sociales para el trastorno de la personalidad esquizotípica**

Margaret M. McClure, Ph.D., et al. EDITORIAL • VIDEO

La guanfacina puede ser un aumento farmacéutico adecuado a la remediación y el entrenamiento de habilidades sociales, utilizados para tratar a individuos con trastornos del espectro de la esquizofrenia. La intervención fue bien tolerada y no se observaron efectos secundarios.

**315 Prueba de concepto para una estrategia de tratamiento adaptativo para prevenir el fracaso de la TCC ofrecida por Internet: Un ensayo clínico sencillo ciego aleatorizado, con pacientes con insomnio**

Erik Forsell, M.Sc., et al. EDITORIAL • CME

Una forma adaptativa de terapia cognitivo-conductual ofrecida por Internet para el tratamiento del insomnio, en la que el tratamiento se ajustó con base en signos tempranos de problemas clínicos, mostró tener ventajas clínicas. Futuros estudios deben abordar cómo el modelo propuesto funciona en la atención regular.

**OTROS TEMAS DE INTERÉS**

**324 Declaraciones de los Editores del AJP**

**324 [Corrections]**

**325 Educación Médica Continuada**

**Cubierta:** [This issue of the *Journal* underscores the importance of current efforts and future support for research aimed at improving psychotherapy and psychosocial interventions.]

**AUDIO** Article is highlighted in AJP Audio, a downloadable .mp3 file available at [ajp.psychiatryonline.org](http://ajp.psychiatryonline.org)

**EDITORIALE** Article is discussed in one of the issue's editorials

**EMC** A course covering the content of this article is available online for paid subscribers to the AJP CME Course program

**VIDEO** Article is highlighted online by Deputy Editor Daniel S. Pine, M.D.

**La Tabla de Contenidos y resúmenes de Este Número Está Disponible en Español**

(Abstracts are also available in Spanish)

Translation presented in collaboration with the Office of Global Health, Rutgers-Robert Wood Johnson Medical School. Support for this effort provided by ACTA Colombia.

**Translation courtesy of**

**Sergi Casals, M.A.**, Garuna, Medellín, Colombia ([www.garunaeditors.com](http://www.garunaeditors.com))

**Carlos López Jaramillo, M.D., M.Sc., Ph.D.**, Universidad de Antioquia, Medellín, Colombia

**Javier I. Escobar, M.D., M.Sc.**, Rutgers-Robert Wood Johnson Medical School

## Beneficios de adicionar secuencialmente terapia cognitivo-conductual o medicación antidepresiva para adultos con depresión que no remite

Boadie W. Dunlop, M.D., Devon LoParo, Ph.D., Becky Kinkead, Ph.D., Tanja Mletzko-Crowe, M.A., Steven P. Cole, Ph.D., Charles B. Nemeroff, M.D., Ph.D., Helen S. Mayberg, M.D., W. Edward Craighead, Ph.D.

**Objetivo:** Los adultos con trastorno de depresión mayor no alcanzan la remisión con un tratamiento inicial. La adición de psicoterapia para los pacientes que no alcanzan la remisión con solamente antidepresivos puede servir para tratar los síntomas residuales y proteger contra la recurrencia, pero se ha estudiado poco la utilidad de adicionar medicación antidepresiva después de no haber remitido con terapia cognitivo-conductual (TCC). El objetivo de los autores fue evaluar los resultados agudos y a largo plazo, resultantes de ambas secuencias de tratamientos de combinación.

**Método:** Un grupo de adultos con depresión mayor que no habían recibido tratamiento y a los que se había asignado aleatoriamente a tomar escitalopram, duloxetina o monoterapia de TCC y completaron 12 semanas de tratamiento sin alcanzar la remisión, recibieron otro tratamiento de combinación por 12 semanas. Para los pacientes que no alcanzaron la remisión con TCC, se adicionó escitalopram (grupo de TCC más medicación) a su tratamiento, y para los que no alcanzaron la remisión con un antidepresivo, se adicionó TCC (grupo de medicación más TCC) a su tratamiento. Los pacientes que respondieron al tratamiento de combinación iniciaron una fase de seguimiento de 18 meses para evaluar el riesgo de recurrencia.

**Resultados:** Un total de 112 pacientes que no alcanzaron la remisión con una monoterapia empezaron un tratamiento de combinación (41 que respondieron a la monoterapia

pero no alcanzaron la remisión y 71 que no respondieron a la monoterapia). En general, las tasas de remisión después de la subsiguiente terapia de combinación fueron significativamente más altas para los pacientes que respondieron a la monoterapia pero no alcanzaron la remisión (61%) que para los pacientes que no respondieron a la monoterapia. Entre los pacientes que respondieron a la monoterapia pero no alcanzaron la remisión, la tasa de remisión en el grupo de TCC más medicación (89%) fue más alta que en el grupo de medicación más TCC (53%). Sin embargo, entre los pacientes con depresión no respondió a la monoterapia, las tasas de respuesta y remisión fueron similares entre ambos brazos de tratamiento. Los niveles altos de ansiedad, tanto antes de la monoterapia como antes del inicio del tratamiento de combinación, predijeron peores resultados para ambos grupos de tratamiento.

**Conclusiones:** El orden en que se combinaron secuencialmente la TCC y la medicación antidepresiva no pareció afectar los resultados. La adición de un antidepresivo es un enfoque efectivo para tratar los síntomas residuales para pacientes que no alcanzaron la remisión con TCC, igual que la adición de TCC después de la monoterapia con antidepresivos. Para los pacientes que no responden a una modalidad de tratamiento, es preciso considerar la adición de la modalidad alternativa.

(*Am J Psychiatry* 2019; 176:275–286)

# Ensayo de preferencias doblemente aleatorizado de exposición prolongada versus sertralina para el tratamiento de TEPT

Lori A. Zoellner, Ph.D., Peter P. Roy-Byrne, M.D., Matig Mavissakalian, M.D., Norah C. Feeny, Ph.D.

**Objetivo:** Los autores examinaron el efecto de la preferencia de tratamiento de los pacientes en la efectividad diferencial de la exposición prolongada y la sertralina para el tratamiento del trastorno de estrés postraumático (TEPT).

**Método:** En un ensayo de preferencias doblemente aleatorizado, 200 pacientes con TEPT vieron las justificaciones estandarizadas del tratamiento antes de la aleatorización. Inicialmente los pacientes fueron divididos aleatoriamente en dos grupos: los de un grupo podrían escoger el tratamiento de su preferencia, y los del otro grupo no. Los que fueron asignados al grupo que no podía escoger el tratamiento de su preferencia, después fueron asignados para recibir exposición prolongada o sertralina. El tratamiento agudo duró 10 semanas, con un seguimiento de 24 meses. La gravedad de los síntomas del TEPT evaluada por un entrevistador fue la principal medida resultado, y la depresión, la ansiedad y el funcionamiento fueron evaluados como resultados adicionales.

**Resultados:** Los pacientes prefirieron la exposición prolongada a la sertralina (número necesario a tratar para producir un beneficio [NNTB]=4,5). Utilizando análisis de intención de tratar (N=200), tanto la exposición prolongada como la ser-

tralina mostraron grandes ganancias que se mantuvieron por 24 meses. Aunque no se observó ningún efecto diferencial en la gravedad del TEPT evaluada por un entrevistador, hubo un beneficio significativo de la exposición prolongada, por encima de la sertralina, en el abandono (documentado por un entrevistador) del diagnóstico de TEPT (NNTB=7,0), la respuesta al tratamiento (NNTB=5,7) y el funcionamiento y los síntomas autoreportados de TEPT, depresión y ansiedad (tamaños de efecto: 0,40-0,72). Para los pacientes que recibieron el tratamiento de su preferencia, hubo una mayor probabilidad de que fueran adherentes, abandonaran su diagnóstico de TEPT (NNTB=3,4), llegaran a responder al tratamiento (NNTB=3,4) y tuvieran menos síntomas autoreportados de TEPT, depresión y ansiedad (tamaños de efecto: 0,40-0,72)

**Conclusiones:** La exposición prolongada y la sertralina confieren beneficios significativos para el TEPT, con cierta evidencia de que dichos beneficios son mayores para la exposición prolongada. Dar a los pacientes con TEPT el tratamiento de su preferencia también confiere beneficios importantes, incluyendo un refuerzo de la adherencia.

(*Am J Psychiatry* 2019; 176:287–296)

# Un ensayo controlado aleatorizado de entrenamiento en funcionamiento ejecutivo, comparado con entrenamiento perceptual, para los trastornos del espectro de la esquizofrenia: Efectos en la neuropsicología, la neurocognición y el funcionamiento

Michael W. Best, M.Sc., Melissa Milanovic, M.Sc., Felicia Iftene, M.D., Christopher R. Bowie, Ph.D.

**Objetivo:** La remediación cognitiva es un tratamiento eficaz para la esquizofrenia. Sin embargo, se han desarrollado diferentes enfoques teóricos sin ningún estudio para compararlos directamente. Este es el primer estudio en comparar los dos enfoques dominantes a la remediación cognitiva (entrenamiento de las habilidades ejecutivas y entrenamiento de las habilidades perceptuales) e hizo uso de la batería de evaluación más amplia en la literatura hasta la fecha.

**Método:** Pacientes ambulatorios con trastornos del espectro de la esquizofrenia se asignaron en forma aleatoria a recibir entrenamiento ejecutivo o entrenamiento perceptual. Se evaluó la actividad electrofisiológica, la neurocognición, la competencia funcional, el funcionamiento de la comunidad evaluado por el administrador del caso, los síntomas clínicos y medidas auto-reportadas, al inicio del estudio, inmediatamente después del tratamiento y en una evaluación de seguimiento post-tratamiento a las 12 semanas.

**Resultados:** El entrenamiento perceptual mejoró la disparidad negativa (*Mismatch Negativity*) del EEG significativamente más que el entrenamiento ejecutivo inmediatamente

después del tratamiento, aunque el efecto no perduró en el seguimiento a las 12 semanas. En el seguimiento, en comparación con el entrenamiento perceptual, el entrenamiento ejecutivo tuvo un mayor efecto de mejora en la energía theta durante una tarea n-back, y en la neurocognición, la competencia funcional y el funcionamiento de la comunidad evaluado por el administrador del caso. Estos efectos no se observaron inmediatamente después del tratamiento.

**Conclusiones:** Tanto el entrenamiento ejecutivo como el entrenamiento perceptual mejoran los mecanismos neuropsicológicos específicos de sus dominios de intervención, aunque solamente el entrenamiento ejecutivo resultó en mejoras en la neurocognición y el funcionamiento. Las diferencias en la mejoría a favor del entrenamiento ejecutivo no se vieron inmediatamente después del tratamiento, sino que surgieron 12 semanas después de haber finalizado el tratamiento activo. Así, la intervención a corto plazo dirigida a funciones cognitivas de orden superior puede ser un primer paso hacia una mayor mejoría cognitiva y funcional.

(*Am J Psychiatry* 2019; 176:297–306)

## Aumento con guanfacina de una intervención combinada de terapia de remediación cognitiva informatizada y entrenamiento en habilidades sociales para el trastorno de la personalidad esquizotípica

Margaret M. McClure, Ph.D., Fiona Graff, Psy.D., Joseph Triebwasser, M.D., Mercedes Perez-Rodriguez, M.D., Ph.D., Daniel R. Rosell, M.D., Ph.D., Harold Koenigsberg, M.D., Erin A. Hazlett, Ph.D., Larry J. Siever, M.D., Philip D. Harvey, Ph.D., Antonia S. New, M.D.

**Objetivo:** El deterioro cognitivo es un rasgo distintivo de los trastornos del espectro de la esquizofrenia y es el mejor predictor del resultado funcional. La terapia de remediación cognitiva ha demostrado ser eficaz para mejorar la cognición, aumentar otros esfuerzos de rehabilitación en la esquizofrenia y lograr ganancias en el funcionamiento en el mundo real. Se ha intentado el aumento farmacológico de la remediación cognitiva, pero no se han estudiado los efectos del aumento en las terapias combinadas, como remediación cognitiva y entrenamiento en habilidades sociales.

**Método:** Veintiocho pacientes con trastorno de la personalidad esquizotípica participaron en un ensayo aleatorizado, doble ciego y controlado con placebo de 8 semanas de guanfacina más remediación cognitiva y entrenamiento en habilidades sociales (15 guanfacina, 13 placebo). Se evaluó la cognición con la batería MCCB (batería de consenso cognitivo de MATRICS [Investigación de tratamientos y mediciones para mejorar la cognición en esquizofrenia]); la cognición social, con la herramienta audiovisual MASC (*Movie for the Assessment of Social Cognition*); y la capacidad funcional, con la escala UPSA (evaluación de habilidades basada en el desempeño, de la Universidad de San Diego).

**Resultados:** Observaciones de cambios antes y después del tratamiento demostraron un efecto significativo para la ve-

locidad de procesamiento, el aprendizaje verbal y el aprendizaje visual en la batería MCCB, y en la puntuación total de la escala UPSA. Se observó una interacción significativa entre tiempo y medicación (guanfacina, placebo) en el razonamiento y la resolución de problemas en la batería MCCB y en la puntuación total en la escala UPSA; la interacción entre tiempo y medicación fue casi significativa para los errores de hipomentalización en el MASC.

**Conclusiones:** Tanto la guanfacina como la remediación cognitiva más entrenamiento en habilidades sociales fueron bien tolerados, y no hubo efectos secundarios ni deserciones. Los participantes tratados con remediación cognitiva, entrenamiento en habilidades sociales y guanfacina mostraron mejoras estadísticamente significativas en razonamiento y resolución de problemas, igual que en capacidad funcional y posiblemente en cognición social, en comparación con los que fueron tratados con remediación cognitiva, entrenamiento en habilidades sociales y placebo. La combinación de remediación cognitiva más entrenamiento en habilidades sociales puede ser una intervención adecuada para individuos con trastorno de la personalidad esquizotípica y la guanfacina parece ser un aumentador farmacéutico prometedor a esta intervención psicosocial.

(*Am J Psychiatry* 2019; 176:307–314)

# Prueba de concepto para una estrategia de tratamiento adaptativo para prevenir el fracaso de la TCC ofrecida por Internet: Un ensayo clínico ciego, sencillo y aleatorizado, con pacientes con insomnio

Erik Forsell, M.Sc., Susanna Jernelöv, Ph.D., Kerstin Blom, Ph.D., Martin Kraepelien, M.Sc., Cecilia Svanborg, M.D., Ph.D., Gerhard Andersson, Ph.D., Nils Lindefors, M.D., Ph.D., Viktor Kaldö, Ph.D.

**Objetivo:** El objetivo de este estudio fue ofrecer prueba de concepto para una estrategia de tratamiento adaptativo en terapia cognitivo-conductual ofrecida por Internet (TCCI), donde el riesgo de fracaso de tratamiento se evalúa al inicio del tratamiento, y el tratamiento para los pacientes en riesgo es adaptado para prevenir el fracaso del tratamiento.

**Método:** Un algoritmo semiautomático evaluó el riesgo de fracaso de tratamiento al inicio del tratamiento en 251 pacientes que estaban recibiendo TCCI para el insomnio siguiendo la guía de un terapeuta. Los pacientes en riesgo fueron asignados aleatoriamente para continuar con la TCCI estándar o para recibir TCCI adaptada. El resultado primario fueron síntomas de insomnio auto-evaluados, utilizando el índice de Gravedad de Insomnio (*Insomnia Severity Index*) en un modelo lineal de efectos mixtos. El principal resultado secundario fue el fracaso del tratamiento (no haber respondido al tratamiento o no haber remitido en la evaluación post-tratamiento).

**Resultados:** Un total de 102 pacientes fueron clasificados como «en riesgo» y asignados aleatoriamente para recibir TCCI adaptada (N=51) o TCCI estándar (N=51); 149 pacientes fueron clasificados como «no en riesgo». Los pacientes

que no estaban en riesgo tuvieron reducciones significativamente mayores en la puntuación del Índice de Gravedad del Insomnio, en comparación con los pacientes en riesgo que recibieron TCCI estándar. La TCCI adaptada para los pacientes en riesgo fue significativamente más efectiva para reducir los síntomas en comparación con la TCCI estándar y disminuyó el riesgo de fracaso del tratamiento (*odds ratio*=0,33). Los pacientes en riesgo que recibieron TCCI adaptada no tuvieron más probabilidad de experimentar fracaso del tratamiento que los que no estaban en riesgo (*odds ratio*=0,51), aunque sí tuvieron menos probabilidades de experimentar remisión. El tratamiento adaptado requirió, en promedio, 14 minutos más de tiempo del paciente con el terapeuta cada una de las semanas restantes.

**Conclusiones:** Una estrategia de tratamiento adaptativo puede aumentar los efectos del tratamiento para pacientes en riesgo y reducir el número de tratamientos que no funcionan. Futuros estudios deberían mejorar la precisión de los algoritmos de clasificación e identificar los factores clave que refuerzan el efecto de los tratamientos adaptados.

(*Am J Psychiatry* 2019; 176:315–323)
